# Supplementary material for: Satellite Analysis of the Environmental Impacts of Armed-Conflict in Rakhine, Myanmar
Source: Research Square preprint supplement (doi:10.21203/rs.3.rs-112904/v1), 2020-12-21
Supplement: Supplementary file 1 [file e9bfcff9d25bd92432e7d33d.docx]

Accuracy Assessment

An accuracy assessment aimed to evaluate a model's ability to detect and delineate environmental changes within a study area during the study period. Supplementary Tables 1 to 6 summarize the classification accuracy validation results and error matrices of the classified maps obtained from the stratified random sampling method. Tables 2, 4, and 6 present error matrices in sample count, and Tables 3, 5, and 7 estimates the area proportion. High overall accuracies and low uncertainties were obtained for all the classification maps. The classification's overall accuracy was 93.77% for 2012, 94.04% for 2017, and 96.27% for 2019. The Confidence Interval (CI) for all the years is 0.95. These high overall accuracies proved that the use of very high-resolution satellite data improved accuracy and yielded a confident high level in land cover change detection.

| **Error matrix, sample counts** | | |  |  |  |  |  |  |  |  |  |
| --- | --- | --- | --- | --- | --- | --- | --- | --- | --- | --- | --- |
|  |  | Reference | | | |  |  |  |  |  |  |
|  |  | *Burned Areas* | *Barren/Shrubland* | *Water/Wetlands* | *Development* | *Forest* | *Residential Area* | *Planted/Cultivated* | Total | Pixels | W_i |
|  | *Burned Areas* | 415 | 168 | 165 | 47 | 23 | 46 | 46 | 910 | 118,723,465 | 0.091 |
| *Barren/Shrubland* | 168 | 66 | 67 | 19 | 10 | 20 | 22 | 372 | 379659907 | 0.292 |
| *Water/Wetlands* | 165 | 65 | 66 | 18 | 12 | 20 | 19 | 365 | 757,905,519 | 0.584 |
| *Development* | 46 | 18 | 19 | 5 | 3 | 4 | 5 | 100 | 42,157,038 | 0.032 |
|  | *Forest* | 23 | 7 | 9 | 3 | 2 | 2 | 4 | 50 | 371,466,634 | 0.286 |
|  | *Residential Area* | 46 | 18 | 19 | 5 | 3 | 4 | 5 | 100 | 118,824,096 | 0.092 |
|  | *Planted/Cultivated* | 46 | 18 | 19 | 5 | 3 | 4 | 5 | 100 | 37400717 | 0.029 |
|  | Total | 909 | 360 | 364 | 102 | 56 | 100 | 106 | 2000 | 1,298,445,929 | 1 |

Supplementary Table 1: Error matrix (sample count) for 2012 based on stratified random sampling

| **Error matrix estimates area proportions.** | | |  |  |  |  |  |  |  |  |  |
| --- | --- | --- | --- | --- | --- | --- | --- | --- | --- | --- | --- |
|  |  | Reference | | | |  |  |  |  |  |  |
|  |  | *Burned Areas* | *Barren/Shrubland* | *Water/Wetlands* | *Development* | *Forest* | *Residential Area* | *Planted/Cultivated* | Total | Pixels | W_i |
| *Burned Areas* | 0.0417 | 0.0169 | 0.0166 | 0.0047 | 0.0023 | 0.0046 | 0.0046 | 0.0914 | 118,723,465 | 0.091 |
| *Barren/Shrubland* | 0.1320 | 0.0519 | 0.0527 | 0.0149 | 0.0079 | 0.0157 | 0.0173 | 0.2924 | 379659907 | 0.292 |
| *Water/Wetlands* | 0.2639 | 0.1039 | 0.1055 | 0.0288 | 0.0192 | 0.0320 | 0.0304 | 0.5837 | 757,905,519 | 0.584 |
|  | *Development* | 0.0149 | 0.0058 | 0.0062 | 0.0016 | 0.0010 | 0.0013 | 0.0016 | 0.0325 | 42,157,038 | 0.032 |
|  | *Forest* | 0.0421 | 0.0165 | 0.0174 | 0.0046 | 0.0027 | 0.0037 | 0.0046 | 0.0915 | 371,466,634 | 0.092 |
|  | *Residential Area* | 0.0132 | 0.0052 | 0.0055 | 0.0014 | 0.0009 | 0.0012 | 0.0014 | 0.0288 | 118,824,096 | 0.029 |
|  | *Planted/Cultivated* | 0.4552 | 0.1803 | 0.1823 | 0.0511 | 0.0280 | 0.0501 | 0.0531 | 1.0000 | 37400717 | 1.000 |
|  | Total | 0.5841 | 0.2186 | 0.2325 | 0.0672 | 0.0418 | 0.0651 | 0.0768 | 1 | 1,298,445,929 |  |
|  | Area [pix] | 758,484,144 | 283,840,265 | 301,826,150 | 87,295,116 | 54,247,433 | 84,487,245 | 99,732,210 | 1,298,445,929 |  |  |
|  | **Area [ha]** | **68,263,573** | **25,545,624** | **27,164,353** | **7,856,560** | **4,882,269** | **7,603,852** | **8,975,899** |  |  |  |
|  | S(Area) | 0.0171 | 0.0132 | 0.0133 | 0.0075 | 0.0060 | 0.0078 | 0.0077 |  |  |  |
|  | S(Area) [ha] | 2,003,221 | 1,539,677 | 1,548,917 | 874,566 | 704,328 | 913,093 | 904,872 |  |  |  |
|  | **95% CI [ha]** | **3,926,312** | **3,017,766** | **3,035,878** | **1,714,149** | **1,380,482** | **1,789,663** | **1,773,549** |  |  |  |
|  | **User's** | **0.86** | **0.98** | **0.98** | **0.95** | **0.84** | **0.90** | **0.98** |  |  |  |
|  | **Producer's** | **0.81** | **0.87** | **0.97** | **0.92** | **0.97** | **0.78** | **0.90** |  |  |  |
|  | **Overall** | **0.9377** |  |  |  |  |  |  |  |  |  |

Supplementary Table 2: Error matrix (area proportion) for 2010 based on stratified random sampling

| **Error matrix, sample counts** | |  |  |  |  |  |  |  |  |  |  |
| --- | --- | --- | --- | --- | --- | --- | --- | --- | --- | --- | --- |
|  |  | Reference | | | |  |  |  |  |  |  |
|  |  | *Burned Areas* | *Barren/Shrubland* | *Water/Wetlands* | *Development* | *Forest* | *Residential Area* | *Planted/Cultivated* | Total | Pixels | W_i |
|  | *Burned Areas* | 1 | 1 | 1 | 1 | 1 | 3 | 2 | 10 | 688888 | 0.001 |
| *Barren/Shrubland* | 1 | 2 | 5 | 11 | 17 | 8 | 6 | 50 | 256847596 | 0.427 |
| *Water/Wetlands* | 0 | 1 | 8 | 15 | 27 | 12 | 12 | 75 | 336,742,943 | 0.559 |
| *Development* | 2 | 8 | 50 | 100 | 194 | 83 | 85 | 522 | 7,675,385 | 0.013 |
|  | *Forest* | 4 | 17 | 86 | 190 | 300 | 140 | 140 | 877 | 336,195,231 | 0.559 |
|  | *Residential Area* | 1 | 7 | 37 | 80 | 140 | 55 | 50 | 370 | 134,800,132 | 0.224 |
|  | *Planted/Cultivated* | 1 | 6 | 35 | 85 | 150 | 65 | 63 | 405 | 79852923 | 0.133 |
|  | Total | 10 | 42 | 222 | 482 | 829 | 366 | 358 | 2309 | 601,954,812 | 1 |

Supplementary Table 3: Error matrix (sample count) for 2017 based on stratified random sampling

| **Error matrix estimates area proportions.** | | |  |  |  |  |  |  |  |  |  |
| --- | --- | --- | --- | --- | --- | --- | --- | --- | --- | --- | --- |
|  |  | Reference | | | |  |  |  |  |  |  |
|  |  | *Burned Areas* | *Barren/Shrubland* | *Water/Wetlands* | *Development* | *Forest* | *Residential Area* | *Planted/Cultivated* | Total | Pixels | W_i |
| *Burned Areas* | 0.0001 | 0.0001 | 0.0001 | 0.0001 | 0.0001 | 0.0003 | 0.0002 | 0.0011 | 688888 | 0.001 |
| *Barren/Shrubland* | 0.0085 | 0.0171 | 0.0427 | 0.0939 | 0.1451 | 0.0683 | 0.0512 | 0.4267 | 256847596 | 0.427 |
| *Water/Wetlands* | 0.0000 | 0.0075 | 0.0597 | 0.1119 | 0.2014 | 0.0895 | 0.0895 | 0.5594 | 336,742,943 | 0.559 |
|  | *Development* | 0.0000 | 0.0002 | 0.0012 | 0.0024 | 0.0047 | 0.0020 | 0.0021 | 0.0128 | 7,675,385 | 0.013 |
|  | *Forest* | 0.0006 | 0.0042 | 0.0224 | 0.0484 | 0.0847 | 0.0333 | 0.0303 | 0.2239 | 336,195,231 | 0.224 |
|  | *Residential Area* | 0.0003 | 0.0020 | 0.0115 | 0.0278 | 0.0491 | 0.0213 | 0.0206 | 0.1327 | 134,800,132 | 0.133 |
|  | *Planted/Cultivated* | 0.0043 | 0.0182 | 0.0961 | 0.2087 | 0.3590 | 0.1585 | 0.1550 | 1.0000 | 79852923 | 1.000 |
|  | Total | 0.0087 | 0.0248 | 0.1037 | 0.2083 | 0.3513 | 0.1601 | 0.1430 | 1 | 601,954,812 |  |
|  | Area [pix] | 5,235,248 | 14,950,329 | 62,408,086 | 125,394,329 | 211,477,069 | 96,401,568 | 86,088,183 | 601,954,812 |  |  |
|  | **Area [ha]** | **471,172** | **1,345,530** | **5,616,728** | **11,285,490** | **19,032,936** | **8,676,141** | **7,747,936** |  |  |  |
|  | S(Area) | 0.0085 | 0.0141 | 0.0272 | 0.0363 | 0.0425 | 0.0327 | 0.0310 |  |  |  |
|  | S(Area) [ha] | 462,371 | 762,960 | 1,471,173 | 1,964,052 | 2,303,735 | 1,770,338 | 1,679,287 |  |  |  |
|  | **95% CI [ha]** | **906,247** | **1,495,402** | **2,883,498** | **3,849,541** | **4,515,321** | **3,469,863** | **3,291,402** |  |  |  |
|  | **User's** | **0.90** | **0.94** | **0.91** | **0.89** | **0.92** | **0.90** | **0.91** |  |  |  |
|  | **Producer's** | **0.091** | **0.69** | **0.88** | **0.91** | **0.81** | **0.91** | **0.91** |  |  |  |
|  | **Overall** | **0.9404** |  |  |  |  |  |  |  |  |  |

Supplementary Table 4: Error matrix (area proportion) for 2017 based on stratified random sampling

| **Error matrix, sample counts** | |  |  |  |  |  |  |  |  |  |  |
| --- | --- | --- | --- | --- | --- | --- | --- | --- | --- | --- | --- |
|  |  | Reference | | | |  |  |  |  |  |  |
|  |  | *Burned Areas* | *Barren/Shrubland* | *Water/Wetlands* | *Development* | *Forest* | *Residential Area* | *Planted/Cultivated* | Total | Pixels | W_i |
|  | *Burned Areas* | 1 | 21 | 4 | 2 | 1 | 15 | 6 | 50 | 28109761 | 0.027 |
| *Barren/Shrubland* | 35 | 561 | 100 | 61 | 35 | 344 | 152 | 1289 | 386123490 | 0.377 |
| *Water/Wetlands* | 20 | 265 | 55 | 20 | 22 | 160 | 90 | 632 | 601,914,848 | 0.588 |
| *Development* | 2 | 42 | 7 | 3 | 2 | 20 | 24 | 100 | 7,880,550 | 0.008 |
|  | *Forest* | 1 | 22 | 4 | 2 | 1 | 10 | 10 | 50 | 374,386,135 | 0.366 |
|  | *Residential Area* | 11 | 241 | 26 | 15 | 10 | 109 | 63 | 575 | 183,336,555 | 0.179 |
|  | *Planted/Cultivated* | 8 | 161 | 43 | 10 | 15 | 64 | 37 | 338 | 95511447 | 0.093 |
|  | Total | 78 | 1313 | 239 | 113 | 86 | 722 | 382 | 3034 | 1,024,028,649 | 1 |

Supplementary Table 5: Error matrix (sample count) for 2019 based on stratified random sampling

| **Error matrix estimates area proportions.** | | |  |  |  |  |  |  |  |  |  |
| --- | --- | --- | --- | --- | --- | --- | --- | --- | --- | --- | --- |
|  |  | Reference | | | |  |  |  |  |  |  |
|  |  | *Burned Areas* | *Barren/Shrubland* | *Water/Wetlands* | *Development* | *Forest* | *Residential Area* | *Planted/Cultivated* | Total | Pixels | W_i |
| *Burned Areas* | 0.0005 | 0.0115 | 0.0022 | 0.0011 | 0.0005 | 0.0082 | 0.0033 | 0.0275 | 28109761 | 0.027 |
| *Barren/Shrubland* | 0.0102 | 0.1641 | 0.0293 | 0.0178 | 0.0102 | 0.1006 | 0.0445 | 0.3768 | 386123490 | 0.377 |
| *Water/Wetlands* | 0.0186 | 0.2465 | 0.0512 | 0.0186 | 0.0205 | 0.1488 | 0.0837 | 0.5878 | 601,914,848 | 0.588 |
|  | *Development* | 0.0002 | 0.0032 | 0.0005 | 0.0002 | 0.0002 | 0.0015 | 0.0018 | 0.0077 | 7,880,550 | 0.008 |
|  | *Forest* | 0.0034 | 0.0750 | 0.0081 | 0.0047 | 0.0031 | 0.0339 | 0.0196 | 0.1479 | 374,386,135 | 0.179 |
|  | *Residential Area* | 0.0022 | 0.0444 | 0.0119 | 0.0028 | 0.0041 | 0.0177 | 0.0102 | 0.0933 | 183,336,555 | 0.093 |
|  | *Planted/Cultivated* | 0.0257 | 0.4328 | 0.0788 | 0.0372 | 0.0283 | 0.2380 | 0.1259 | 0.9667 | 95511447 | 1.000 |
|  | Total | 0.0295 | 0.4253 | 0.0831 | 0.0378 | 0.0314 | 0.2592 | 0.1333 | 1 | 1,024,028,649 |  |
|  | Area [pix] | 30,252,091 | 435,550,203 | 85,137,524 | 38,681,463 | 32,156,884 | 265,438,689 | 136,512,243 | 1,023,729,096 |  |  |
|  | **Area [ha]** | **2,722,688** | **39,199,518** | **7,662,377** | **3,481,332** | **2,894,120** | **23,889,482** | **12,286,102** |  |  |  |
|  | S(Area) | 0.0045 | 0.0128 | 0.0073 | 0.0047 | 0.0047 | 0.0113 | 0.0089 |  |  |  |
|  | S(Area) [ha] | 412,245 | 1,181,496 | 668,247 | 435,837 | 428,586 | 1,044,520 | 824,758 |  |  |  |
|  | **95% CI [ha]** | **808,001** | **2,315,733** | **1,309,764** | **854,240** | **840,028** | **2,047,259** | **1,616,526** |  |  |  |
|  | **User's** | **0.92** | **0.74** | **0.89** | **0.93** | **0.90** | **0.90** | **0.91** |  |  |  |
|  | **Producer's** | **0.92** | **0.89** | **0.62** | **0.91** | **0.90** | **0.91** | **0.91** |  |  |  |
|  | **Overall** | **0.9627** |  |  |  |  |  |  |  |  |  |

Supplementary Table 6: Error matrix (area proportion) for 2019 based on stratified random sampling
